# Supplementary material
Source: MDPI journal article supplement (https://www.mdpi.com/2075-4701/12/7/1107)
Supplement: s1 [file s1]

*Article*

# **Novel Procedures for Sustainable Design in Structural Rehabilitation on Oversized Metal Structures**

**Mocanu Stefan <sup>1</sup>, Rece Laurentiu <sup>1</sup>, Burlacu Adrian <sup>1,\*</sup>, Florescu Virgil <sup>1</sup>, Corneliu Rontescu <sup>2</sup>, Arina Modrea <sup>3</sup>**

<sup>1</sup> Technical University of Civil Engineering of Bucharest, Bucharest 020396, Romania; stefan.mocanu@utcb.ro (S.M.), rece@utcb.ro (L.R.), virgil.florescu@utcb.ro (V.F.)

<sup>2</sup> Quality Engineering and Industrial Technologies Department, Faculty of Industrial Engineering and Robotics, University Politehnica of Bucharest, 313 Spl Independentei, 060042 Bucharest, Romania; corneliu.rontescu@yahoo.com

<sup>3</sup> George Emil Palade University of Medicine, Pharmacy, Science and Technology of Targu Mures, Targu Mures 540088, Romania; arina.modrea@umfst.ro

\* Correspondence: adrian.burlacu@utcb.ro (A.B.); Tel. +40-723-645-722

**Supplementary**

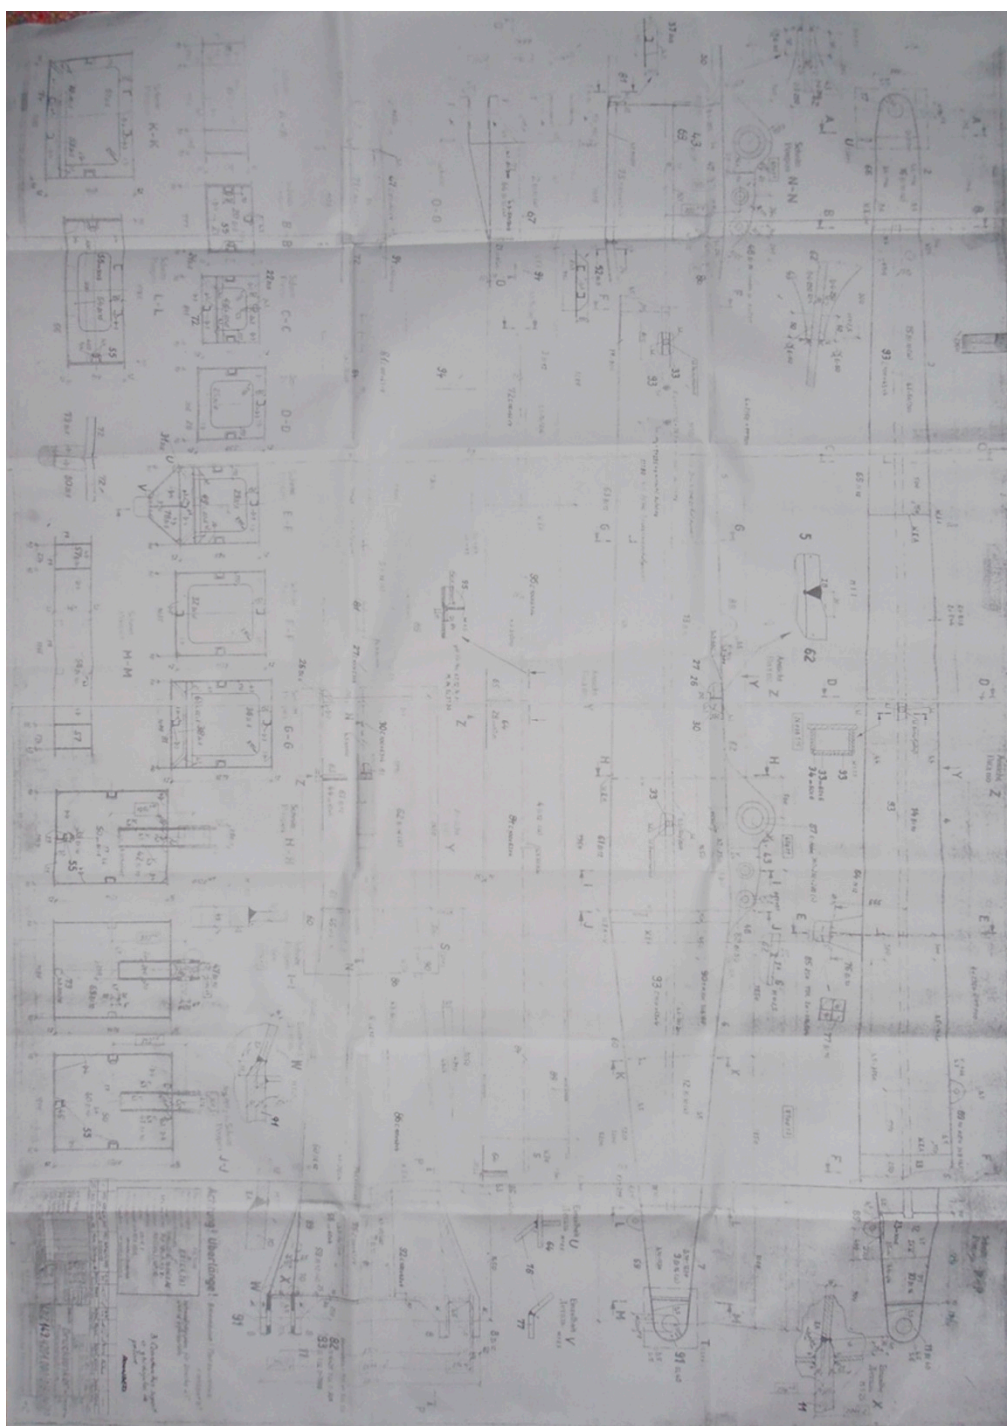

Figure S1. Archive documentation

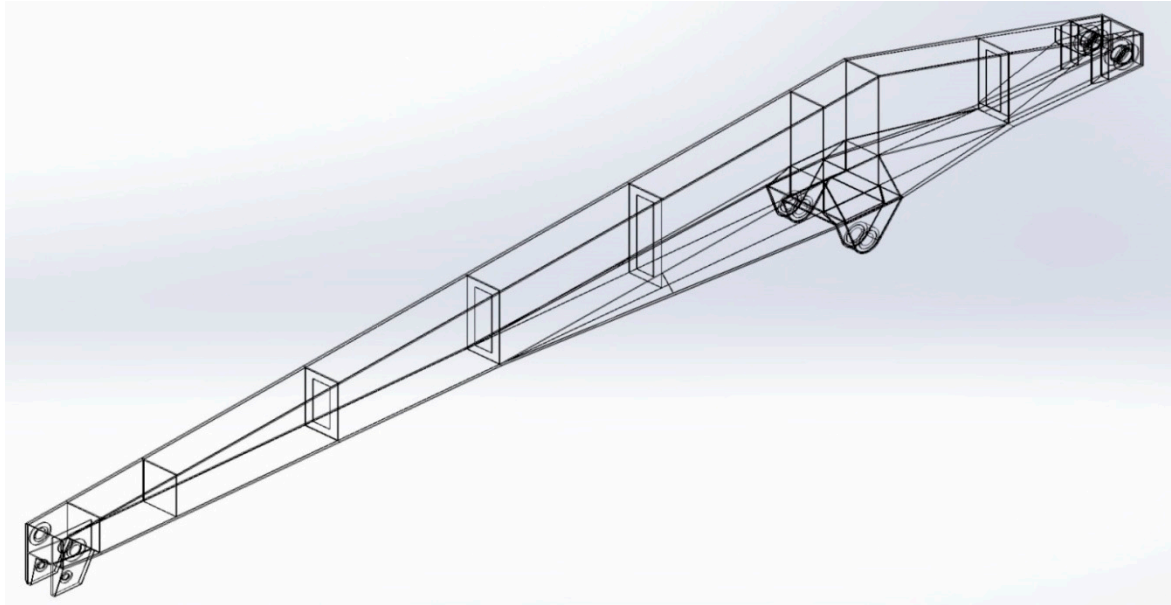

Figure S2. Superior arm

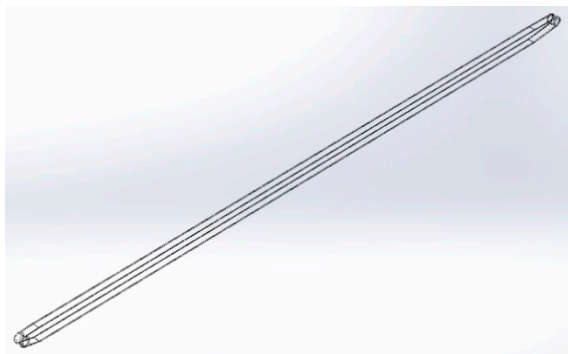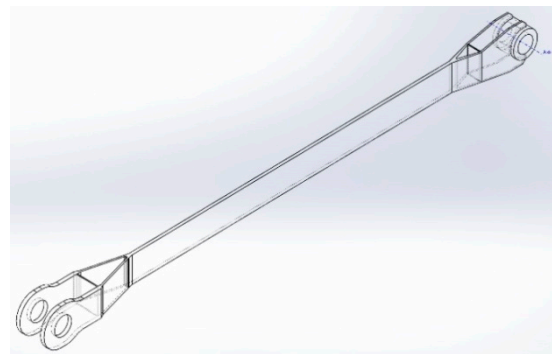

Figure S3. Quadrilateral mechanism-closing elements

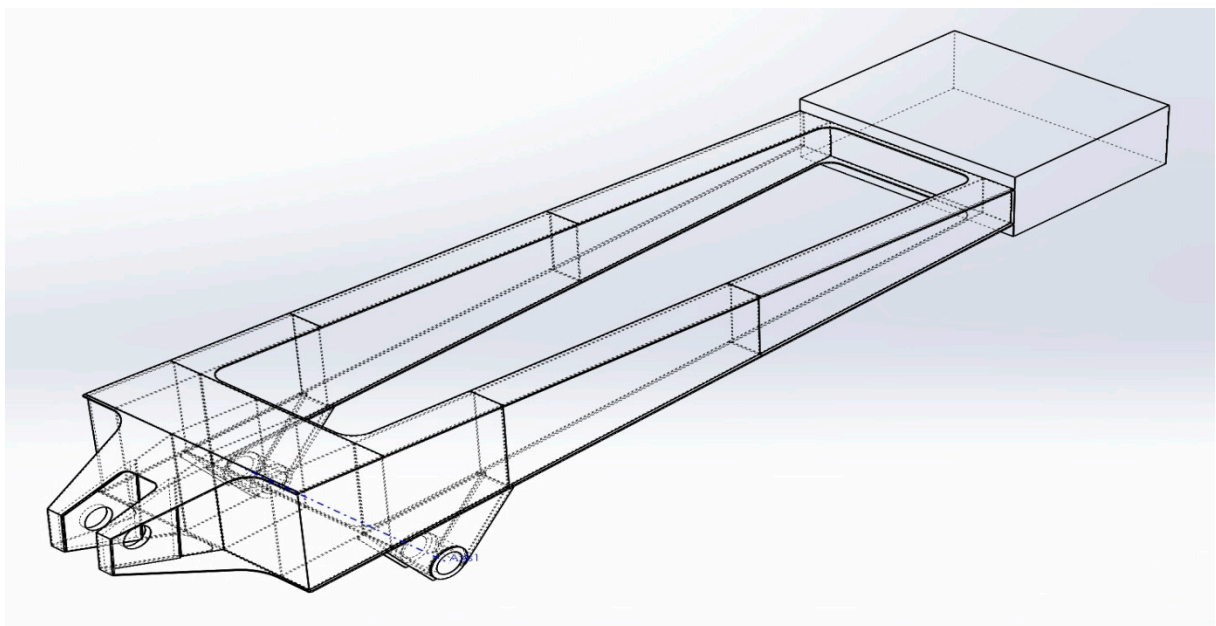

Figure S4. Counterweight

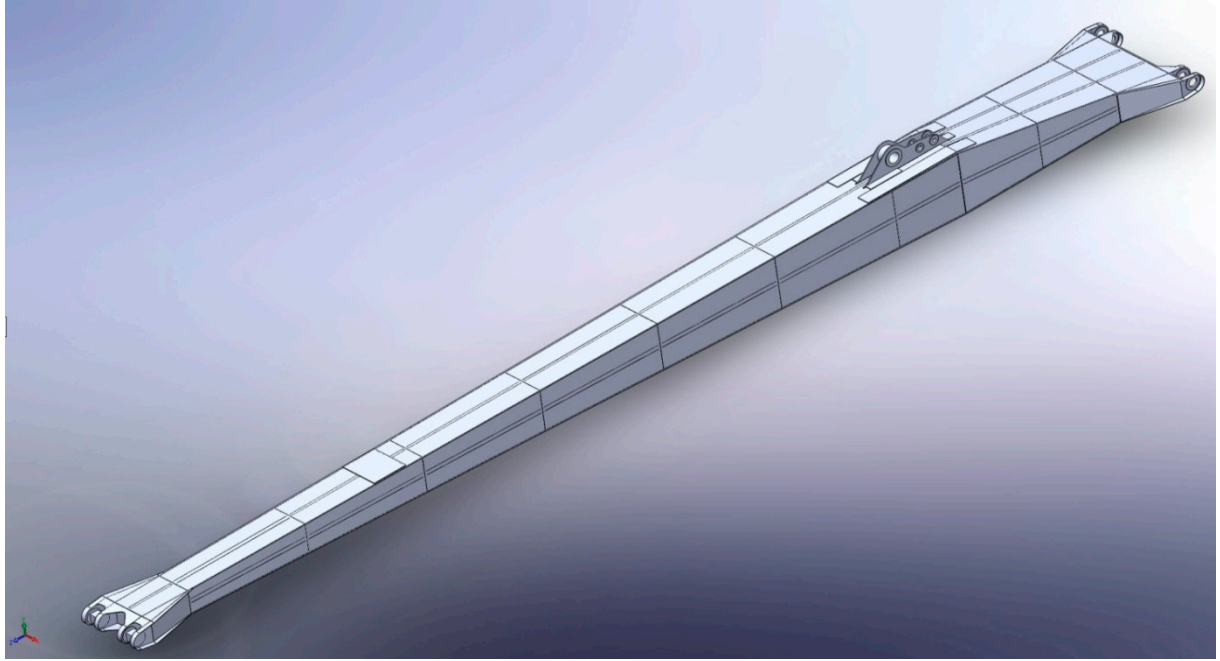

Figure S5. Main boom (arm) section

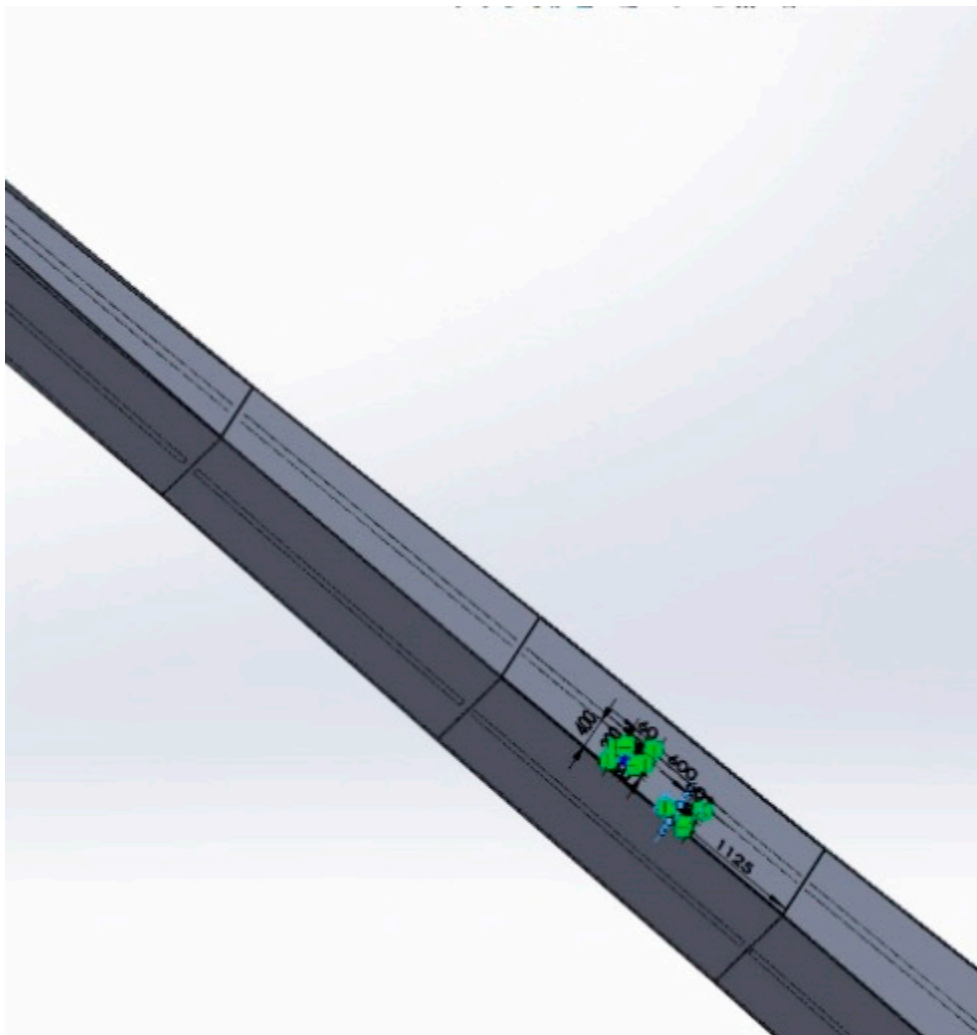

(a)

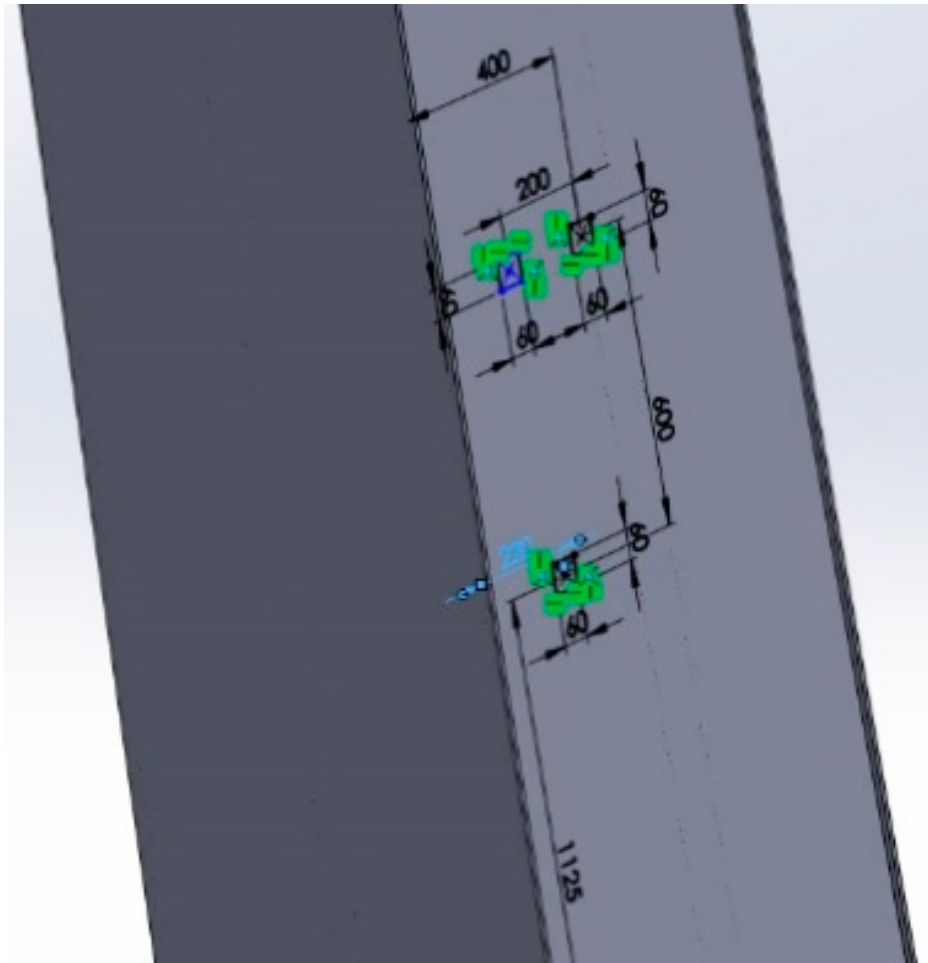

(b)

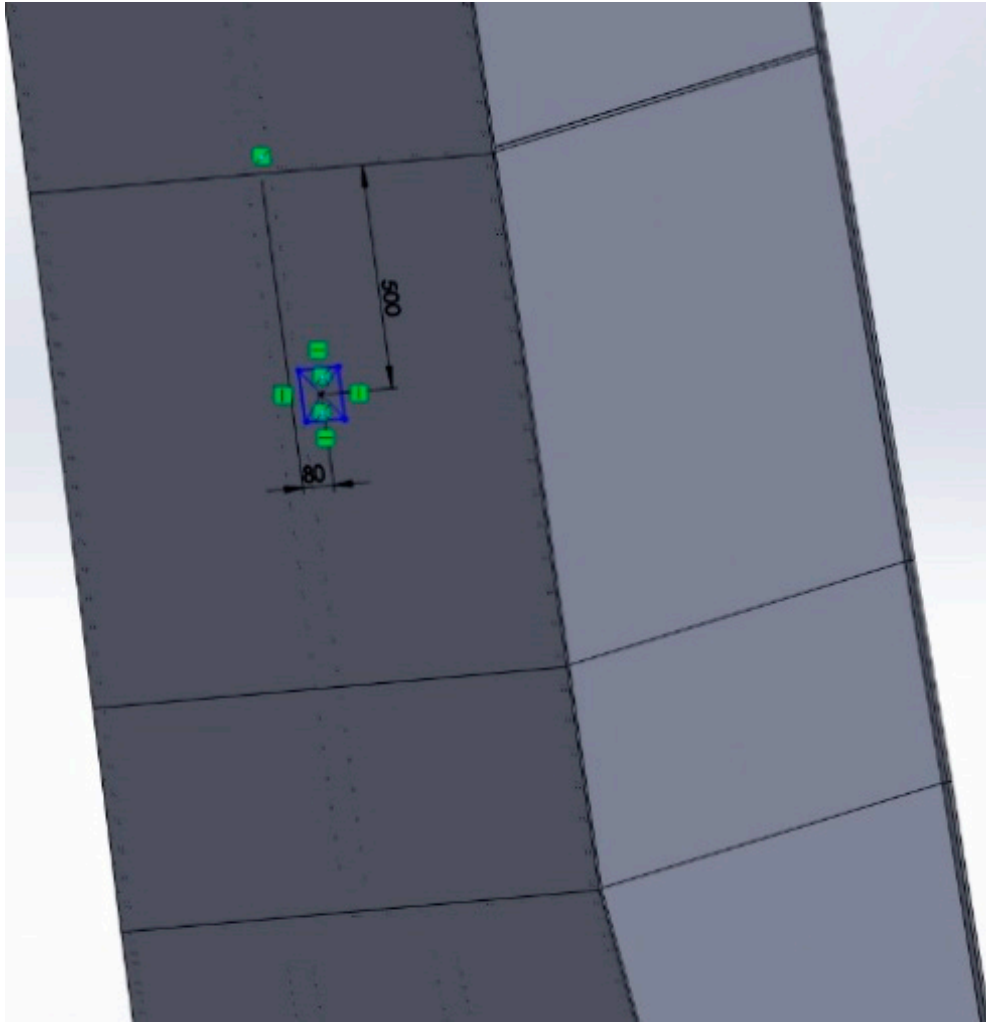

(c)  
Figure S6. (a): Transducer positioning scheme; (b): Transducer positioning scheme; (c):  
Transducer positioning scheme



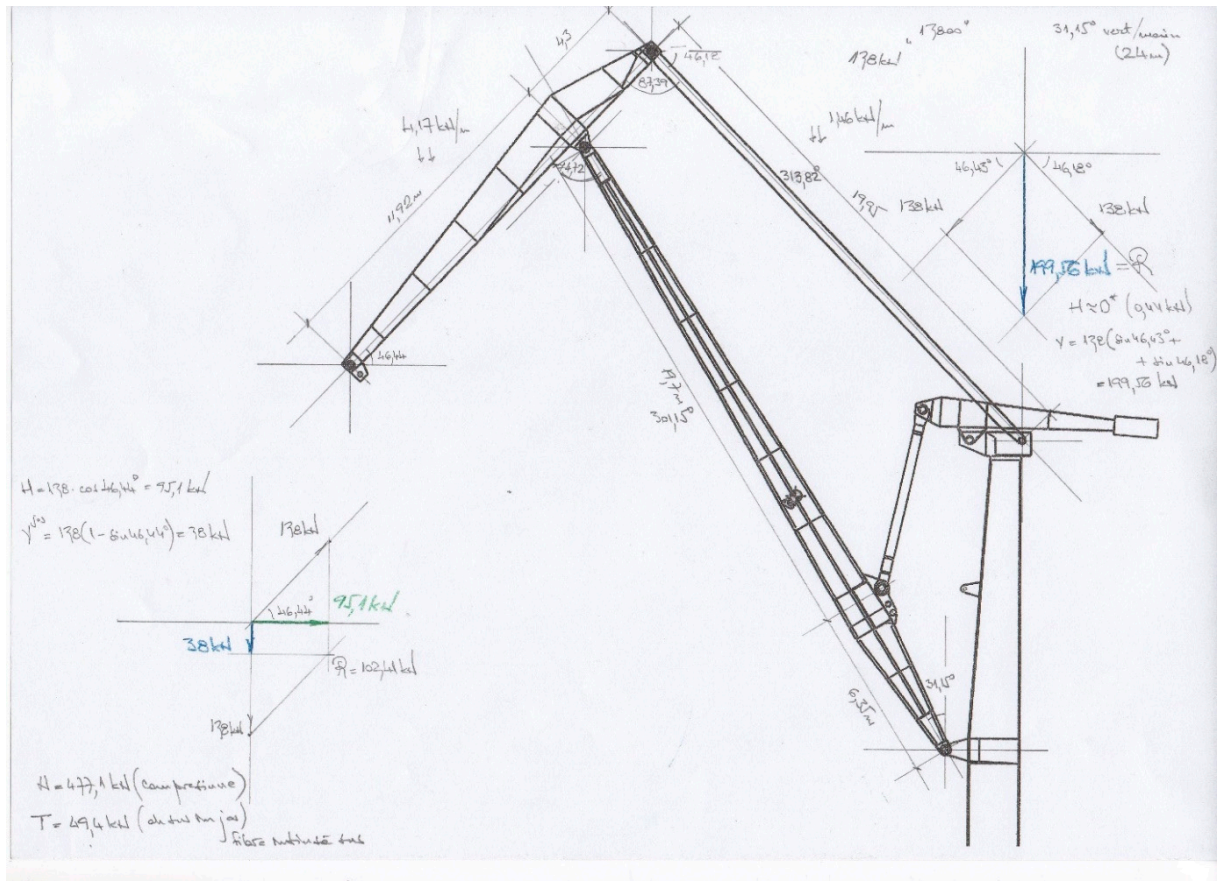

Figure S7. Graphic approach

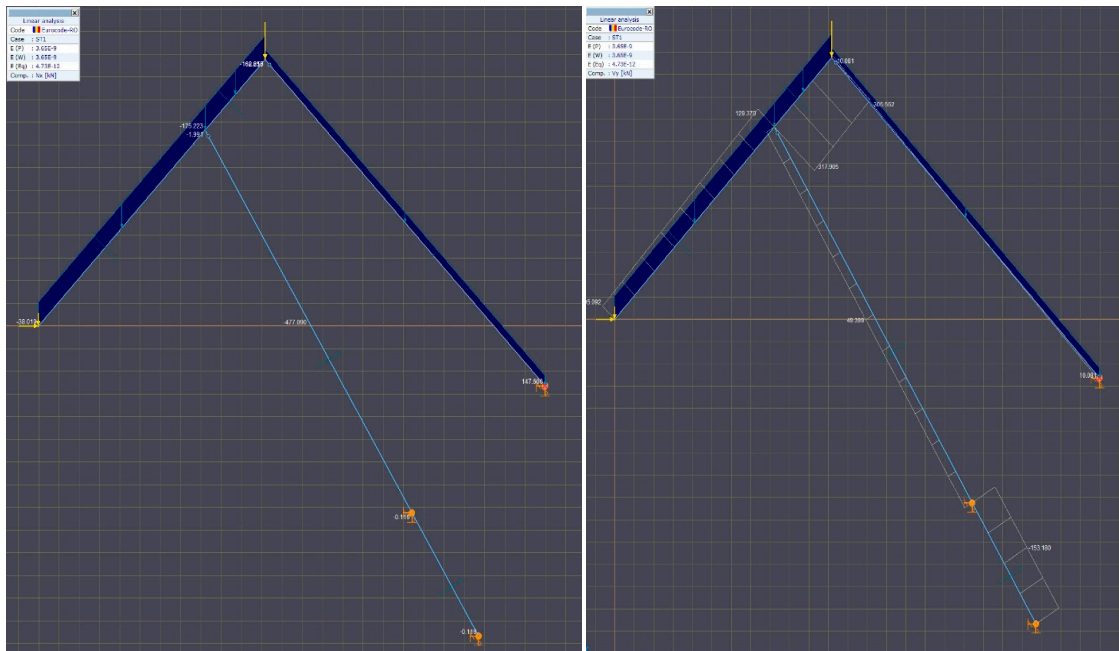

Figure S8. Analytical approach

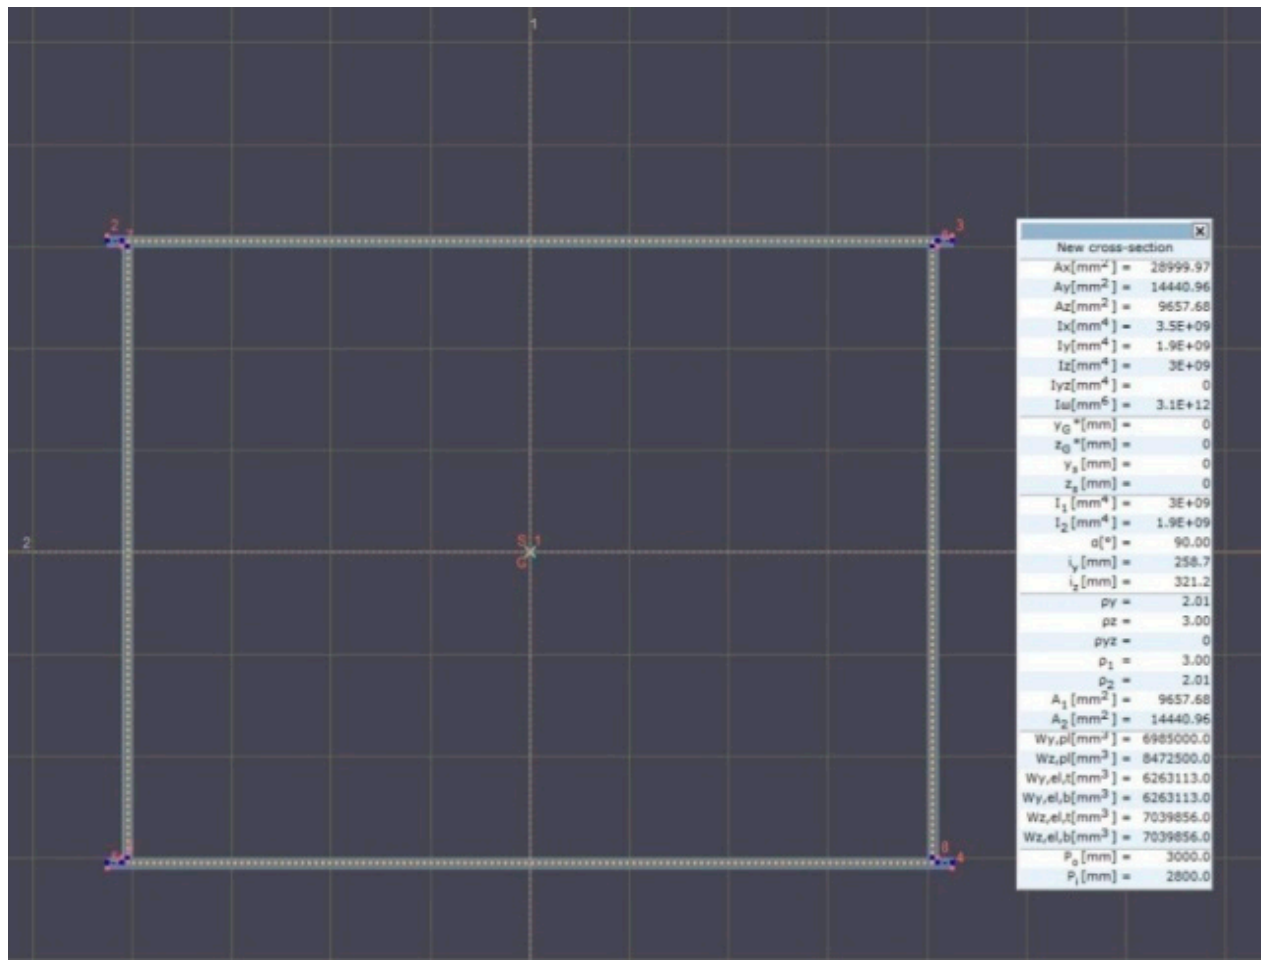

Figure S9. Initial variant cross section



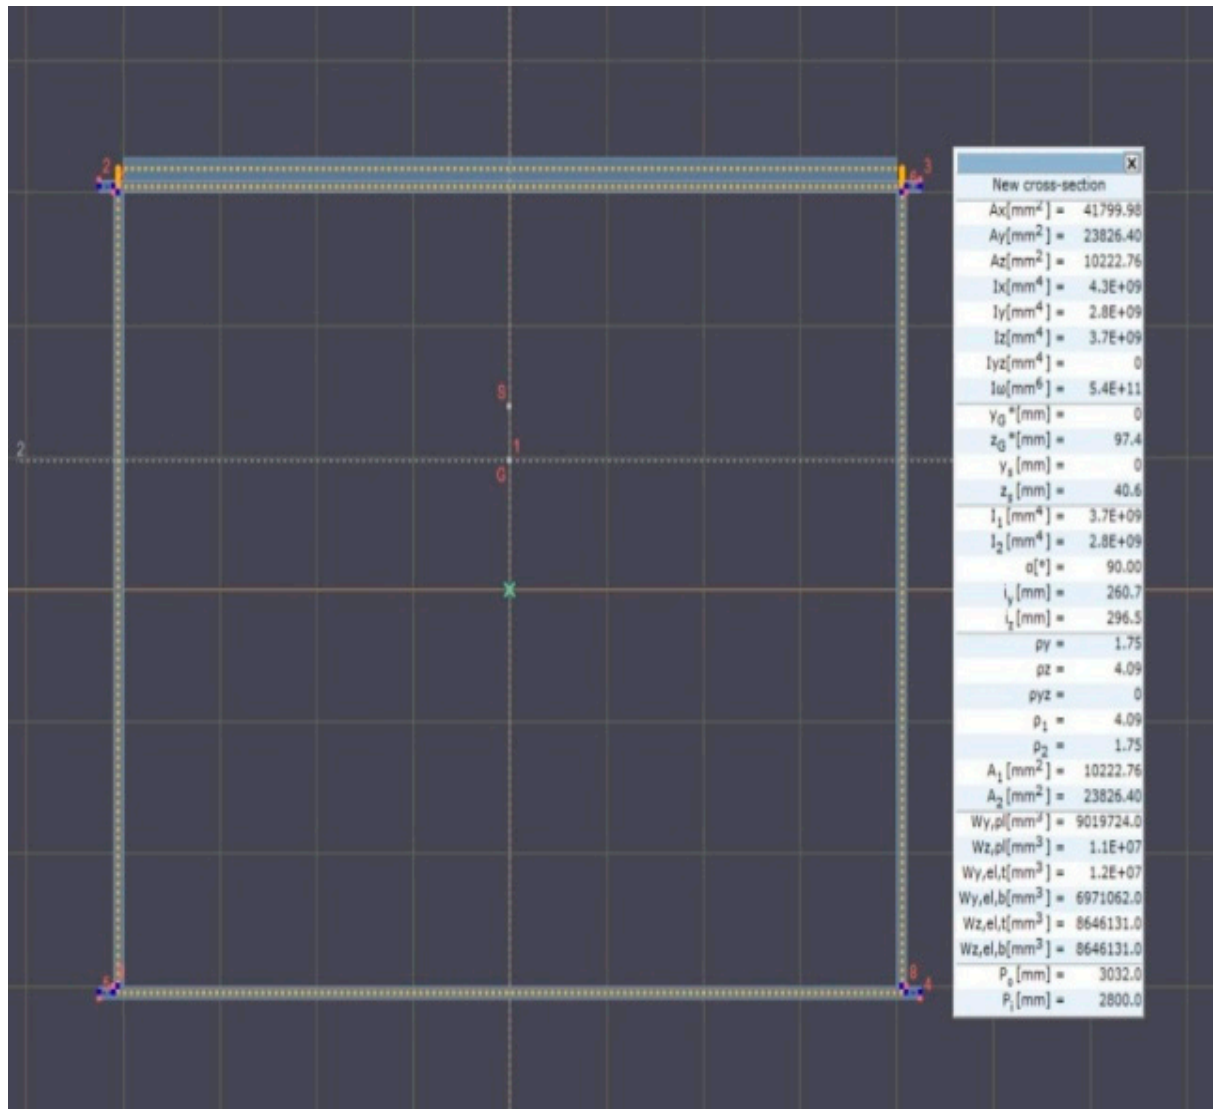

Figure S10. Plated variant cross section

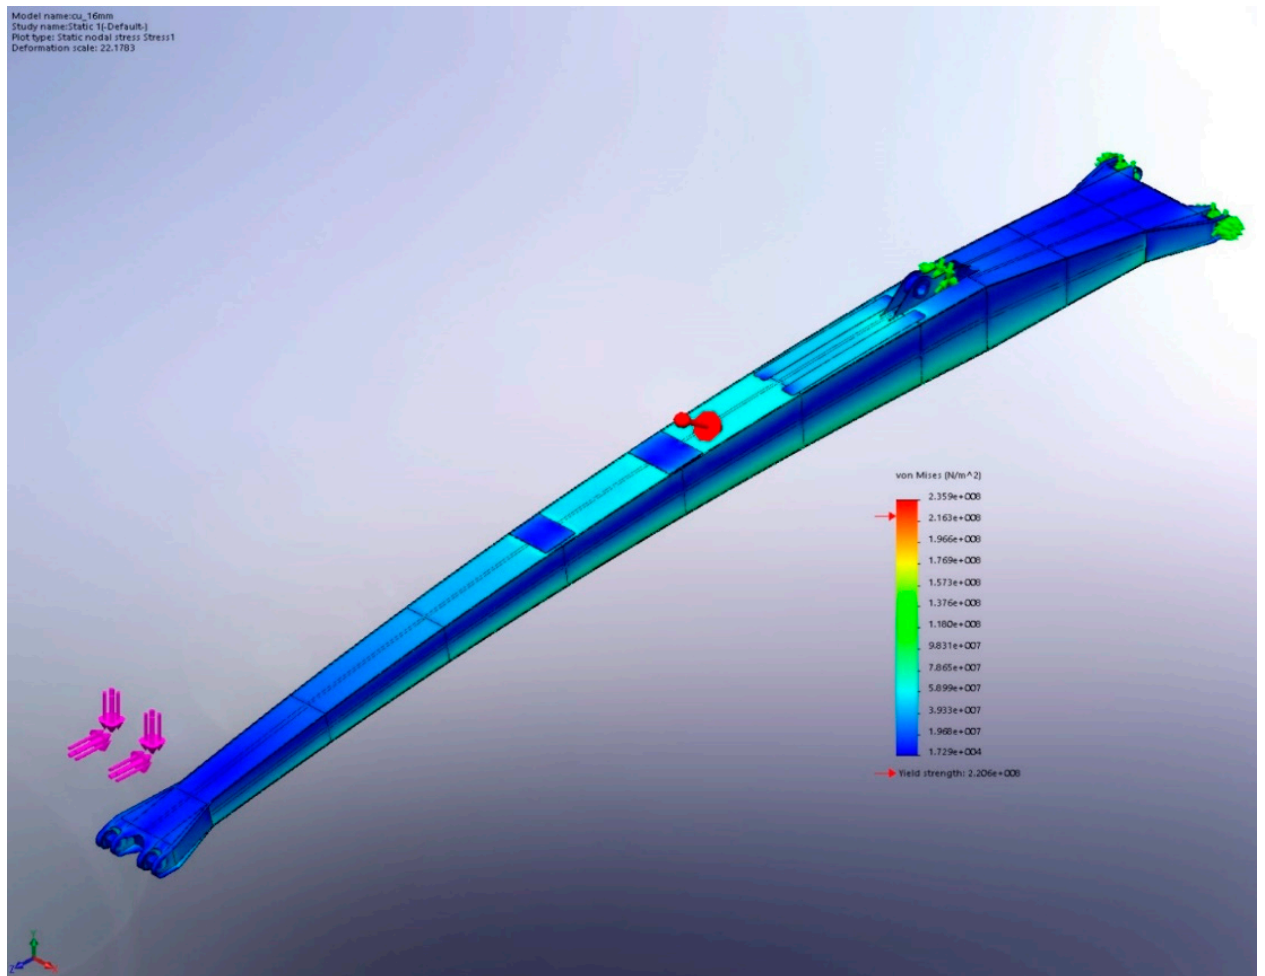

Figure S11. Equivalent normal stress – von Mises criterion.

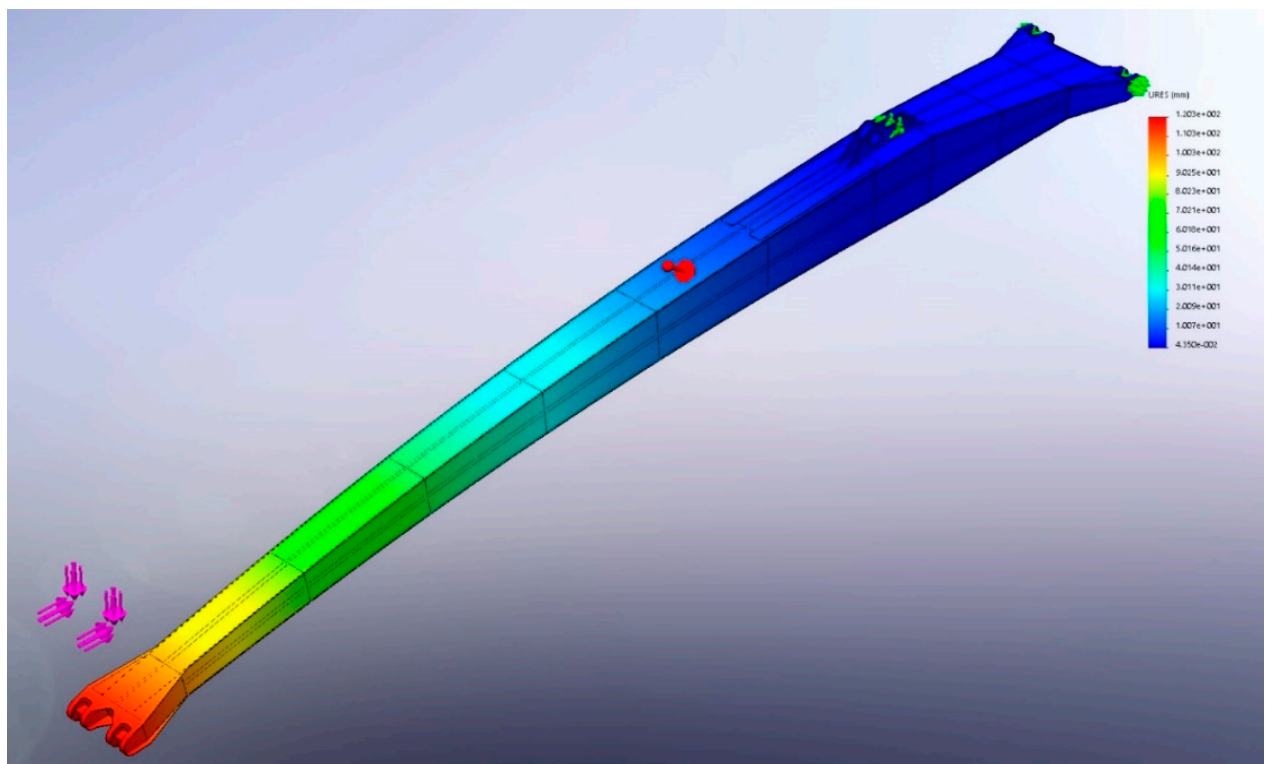

Figure S12. Deformation field.

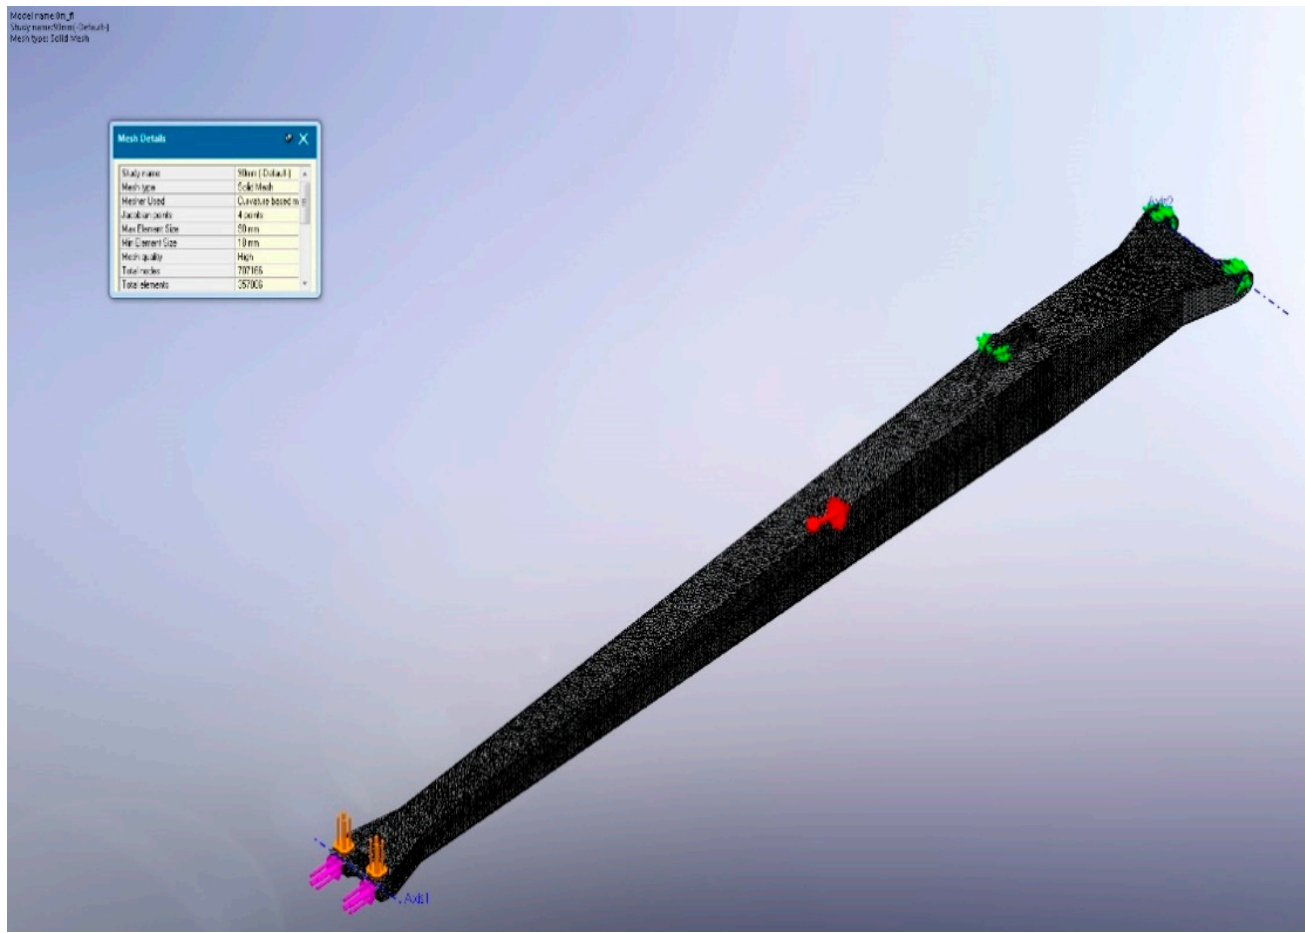

Figure S13. Main boom (arm) meshing.

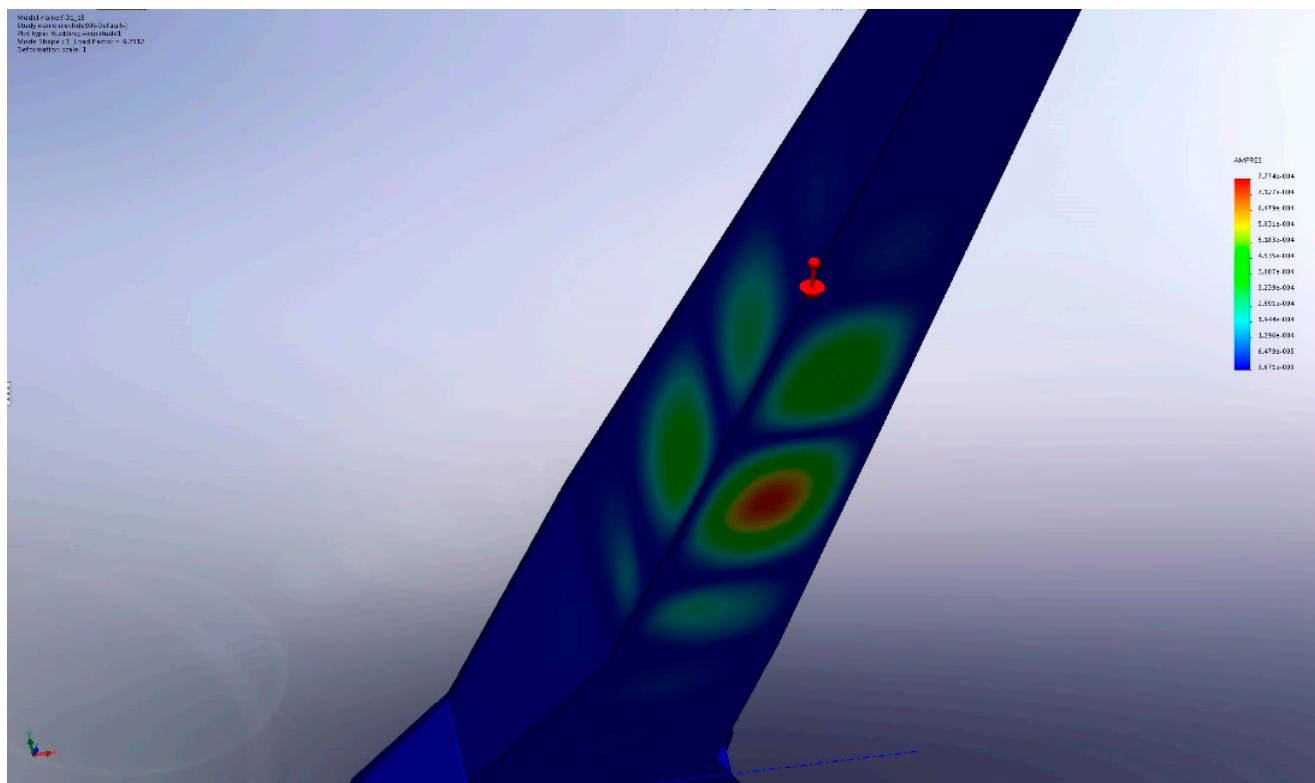

Figure S14. Buckling study.
